# Supplementary material for: Heterogeneous mesoporous manganese oxide catalyst for aerobic and additive-free oxidative aromatization of N-heterocycles
Source: Royal Society of Chemistry journal article supplement (doi:10.1039/c6cc09095h), 2017-01-01
Supplement: c6cc09095h1.pdf [file c6cc09095h1.pdf]

*Supporting Information*

**Heterogeneous Mesoporous Manganese Oxide Catalyst for Aerobic  
and Additive-Free Oxidative Aromatization of N-Heterocycles**

*Kankana Mullick, Sourav Biswas, Alfredo M. Angeles-Boza\*, and Steven L. Suib\**

## Preparation of meso MnO<sub>x</sub>

The catalyst was synthesized following the procedure described by Poyraz *et al.*<sup>1</sup> In a typical synthesis 0.02 mol of manganese nitrate tetrahydrate (Mn (NO<sub>3</sub>)<sub>2</sub>·4H<sub>2</sub>O, 0.02 mol) and 0.134 mol of 1-butanol were added into a 120 mL beaker. To this solution 0.0034 mol of poly(ethylene glycol)-block-poly(propylene glycol)-block-poly(ethylene glycol) (Pluronic P123, PEO<sub>20</sub>PPO<sub>70</sub>PEO<sub>20</sub>, molar mass 5750 g mol<sup>-1</sup>) and 0.032 mol of concentrated nitric acid (HNO<sub>3</sub>) were added and stirred at room temperature until the solution became clear (light pink). The resulting clear solution was then kept in an oven at 120°C for 3 h. After reaction, the black product was washed with excess ethanol, centrifuged, and dried in a vacuum oven overnight. At the end, the dried black powders were subjected to a heating cycle. First they were heated at 150°C for 12 h and cooled down to room temperature followed by heated to 250°C for 4 h.

## Reaction procedure of oxidative aromatization

In a typical reaction, a mixture of 1,2,3,4-tetrahydroquinoline (0.25 mmol), meso MnO<sub>x</sub> (25 mg) and DMF (5 mL) was added in a 25 mL round bottom flask (two-necked flask was used for time dependent study) equipped with a condenser. The reaction mixture was heated to reflux under vigorous stirring (700 rpm) for the required time under an air balloon. After reaction, the mixture was cooled and the catalyst was removed by filtration. The product analysis was done using GC-MS (gas chromatography-mass spectrometry). The conversion was determined based on the concentration of substrate. Most reactions were repeated twice and the average values were used. The products were isolated by filtering off the catalyst followed by evaporation of solvent. For isolation, the reactions have been performed in acetonitrile (at 80°C) for easy solvent evaporation.

## **Analysis of reaction products**

The GC-MS analyses were performed by a 7820A GC system connected with a mass detector of 5975 series MSD from Agilent Technologies and a nonpolar cross-linked methyl siloxane column with dimensions of 12 in  $\times$  0.200 mm  $\times$  0.33  $\mu$ m was used. The  $^1\text{H}$  and  $^{13}\text{C}$  NMR spectra were recorded on a Bruker AVANCE III- 400 MHz spectrometer.  $^1\text{H}$  NMR spectra were collected at 400 MHz with chemical shift referenced to the residual peak in  $\text{CDCl}_3$  ( $\delta$ : H 7.26 ppm).  $^{13}\text{C}$  NMR spectra were collected at 100 MHz and referenced to residual peak in  $\text{CDCl}_3$  ( $\delta$ : C 77.0 ppm). Multiplicities are written as s (singlet), d (doublet), t (triplet), and m (multiplet).

## **Catalyst Characterizations**

The powder X-Ray diffraction (PXRD) data were collected by a Rigaku Ultima IV diffractometer (Cu  $K\alpha$  radiation,  $\lambda=1.5406 \text{ \AA}$ ) with an operating voltage of 40 kV and a current of 44 mA. The PXRD patterns were collected over a  $2\theta$  range of  $5\text{--}75^\circ$  with a continuous scan rate of  $1.0^\circ \text{ min}^{-1}$ . The Nitrogen adsorption desorption experiments were performed with a Quantachrome Autosorb-1-1C automated adsorption system. The samples were treated at  $150^\circ\text{C}$  for 6 h under helium prior to measurement. X-ray photoelectron spectroscopy (XPS) was done on a PHI model 590 spectrometer with multiprobes ( $\Phi$ Physical Electronics Industries Inc.), using Al-K radiation ( $\lambda=1486.6 \text{ eV}$ ) as the radiation source and was fitted using CasaXPS software (version 2.3.12). The powder samples were pressed on carbon tape mounted on adhesive copper tape stuck to a sample stage placed in the analysis chamber. For correction of surface charging, the C 1s photoelectron line at 284.6 eV was taken as a reference. A mixture of Gaussian (70%) and Lorentzian (30%) functions was used for the least-squares curve fitting procedure.

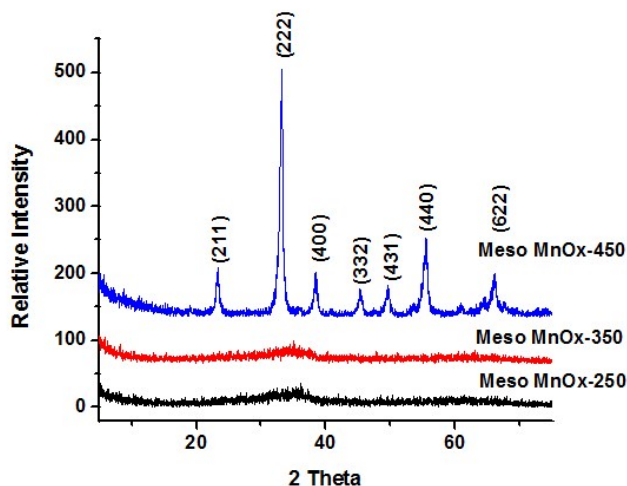

**Figure S1.** Powder X-ray diffraction of meso MnOx at different calcination temperatures. The diffraction patterns at 450°C calcination can be indexed to Mn<sub>2</sub>O<sub>3</sub> phase, whereas calcination temperatures at 250°C and 350°C displayed an amorphous nature.

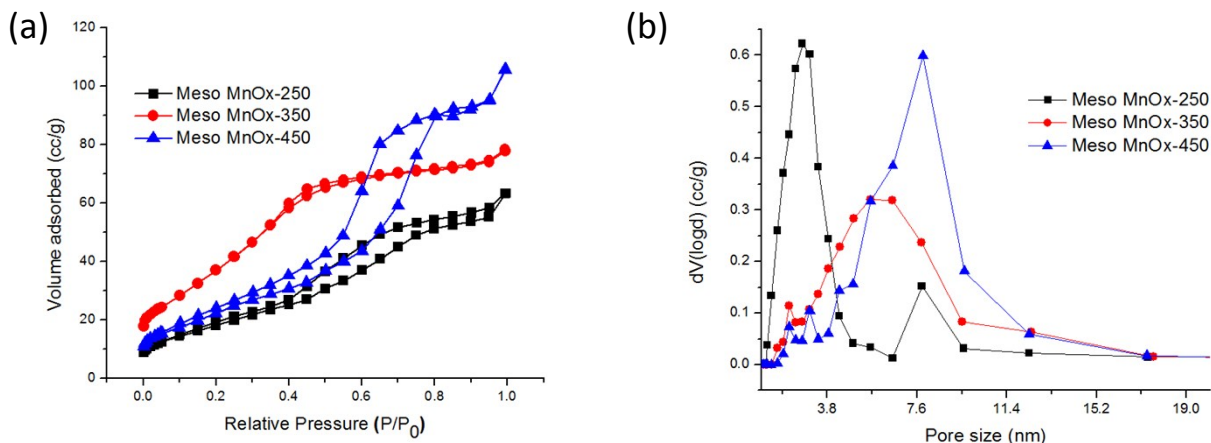

**Figure S2.** (a) Nitrogen adsorption isotherms of meso MnOx at different calcination temperatures. A type IV adsorption isotherm followed by a type I hysteresis loop were observed for all the materials, which confirmed the mesoporous structure and (b) corresponding BJH adsorption pore size distribution

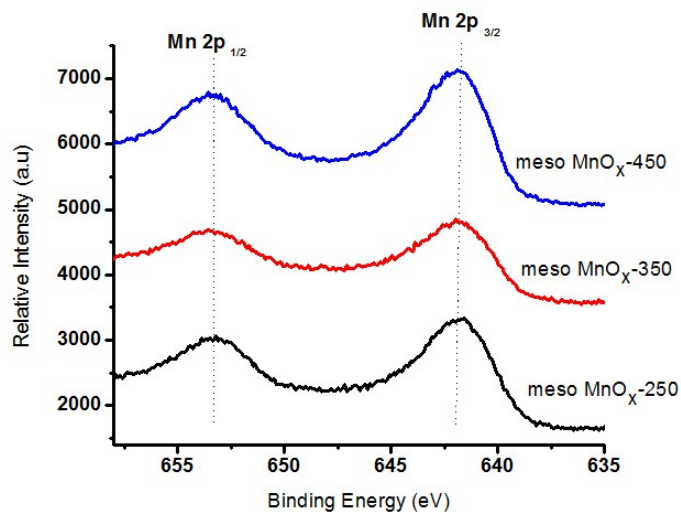

**Figure S3.** XPS of Mn2p of meso MnO<sub>x</sub> at different calcination temperatures. The Mn2p<sub>3/2</sub> binding energy of (641.5±0.2) eV indicates Mn<sup>3+</sup> oxidation state at all calcination temperatures

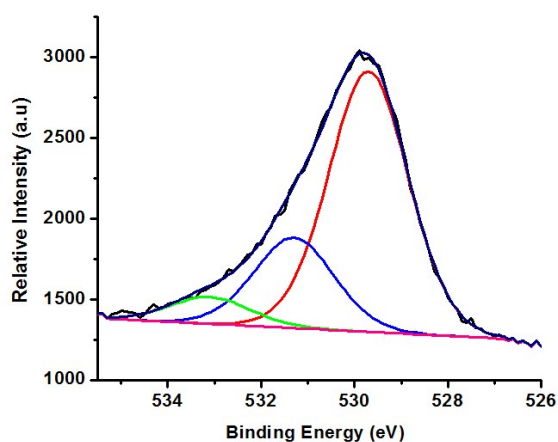

**Figure S4.** XPS analysis deconvoluted O1s spectra of meso MnO<sub>x-250</sub>. O<sub>s</sub> (red line): Structural or lattice oxygen, O<sub>ads</sub> (blue line): Adsorbed oxygen on the surface, O<sub>mw</sub> (green line): Adsorbed water and hydroxyl group.

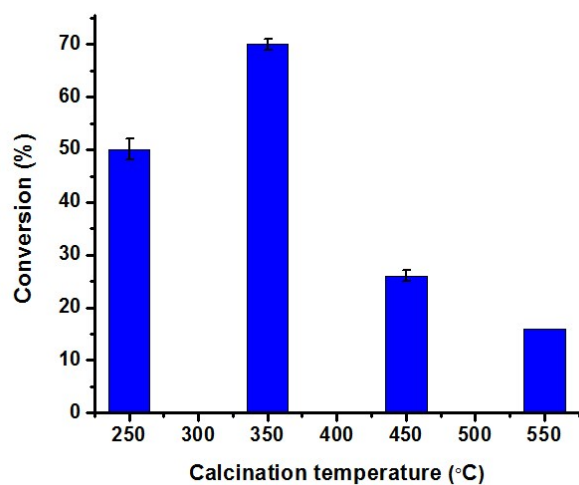

**Figure S5.** Effect of calcination temperature in the performance of meso MnO<sub>x</sub>. Reaction condition: 1,2,3,4-tetrahydroquinoline (0.25 mmol), meso MnO<sub>x</sub> (25 mg), DMF (5 mL), 130°C, air balloon, 5 h.

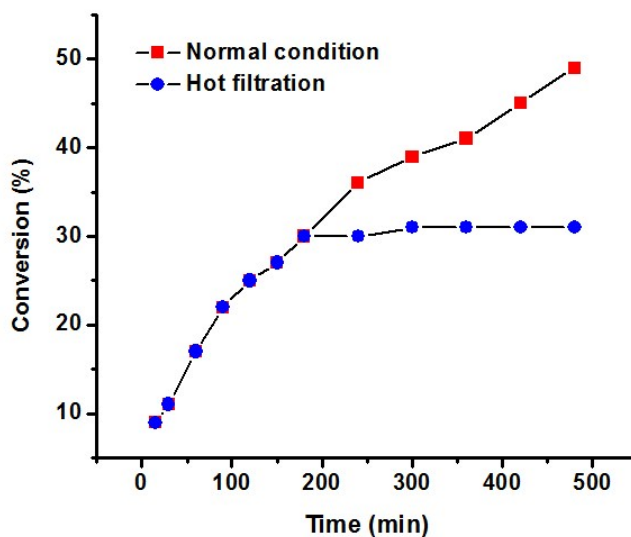

**Figure S6.** Hot filtration test. Reaction condition: 1,2,3,4-tetrahydroquinoline (0.25 mmol), meso MnO<sub>x</sub> (25 mg), DMF (5 mL), 130°C, air balloon. Catalyst was removed at 30% conversion (at 3 h).

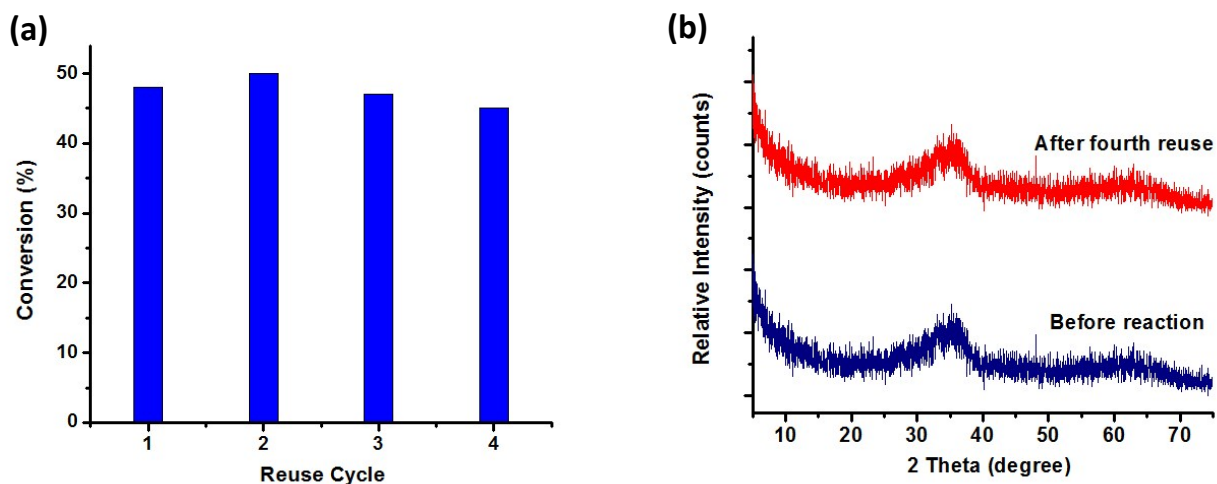

**Figure S7.** (a) Reusability test. Reaction condition: 1,2,3,4-tetrahydroquinoline (0.25 mmol), meso MnO<sub>x</sub> (25 mg), DMF (5 mL), 130°C, air balloon, 5 h. (b) PXRD before and after fourth reuse.

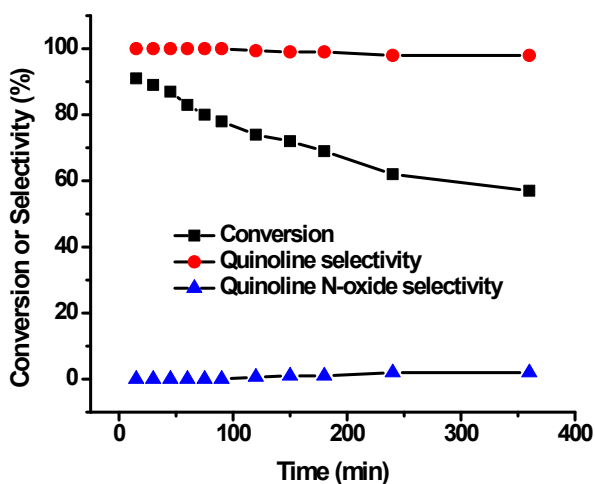

**Figure S8.** Time dependent study. Reaction condition: 1,2,3,4-tetrahydroquinoline (0.25 mmol), meso MnO<sub>x</sub> (25 mg), DMF (5 mL), 130°C, air balloon.

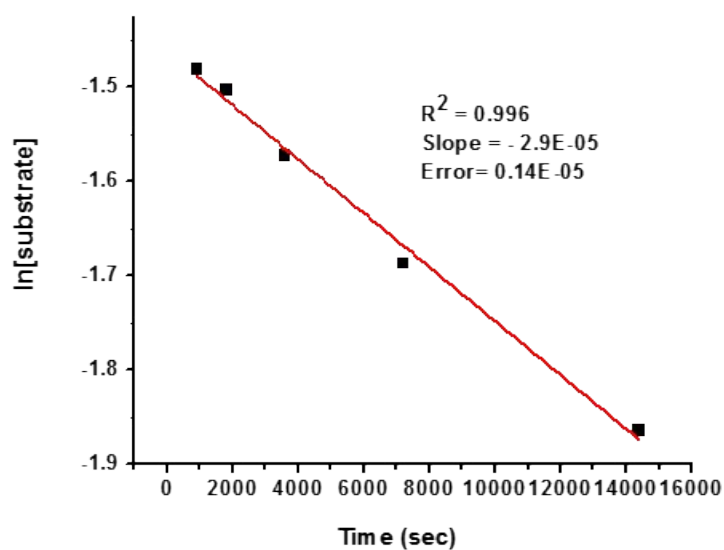

**Figure S9.** Kinetic study. Reaction condition: 1,2,3,4-tetrahydroquinoline (0.25 mmol), meso  $\text{MnO}_x$  (25 mg), DMF (5 mL),  $130^\circ\text{C}$ , air balloon. The reaction depreciated a first order rate with respect to substrate having a rate constant of  $3 \times 10^{-5} \pm 0.1 \times 10^{-5} \text{s}^{-1}$ .

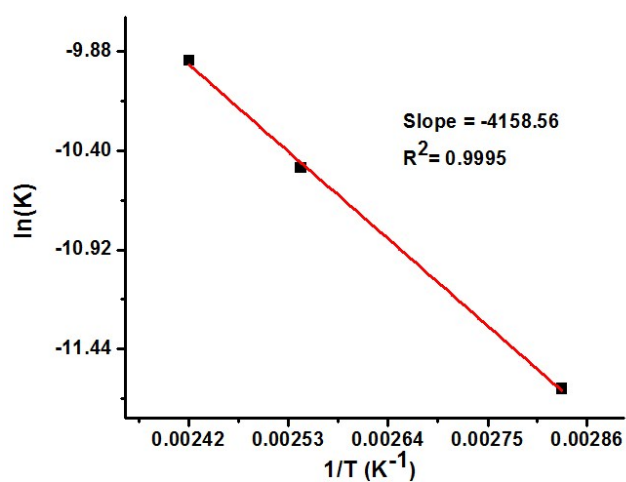

**Figure S10.** Arrhenius plot for the oxidation of 1,2,3,4-tetrahydroquinoline by meso  $\text{MnO}_x$ . The apparent activation energy was estimated as  $8.3 \pm 0.2 \text{ Kcal mol}^{-1}$ . Reaction condition: 1,2,3,4-tetrahydroquinoline (0.25 mmol), meso  $\text{MnO}_x$  (25 mg), DMF (5 mL), 5 h, air balloon. K: rate constant.



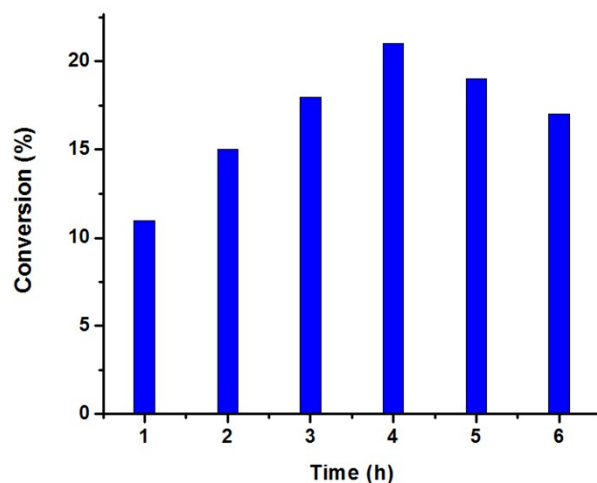

**Figure S11.** Kinetic study under nitrogen atmosphere. Reaction condition: 1,2,3,4-tetrahydroquinoline (0.25 mmol), meso MnO<sub>x</sub> (25 mg), DMF (5 mL), 130°C, nitrogen balloon.

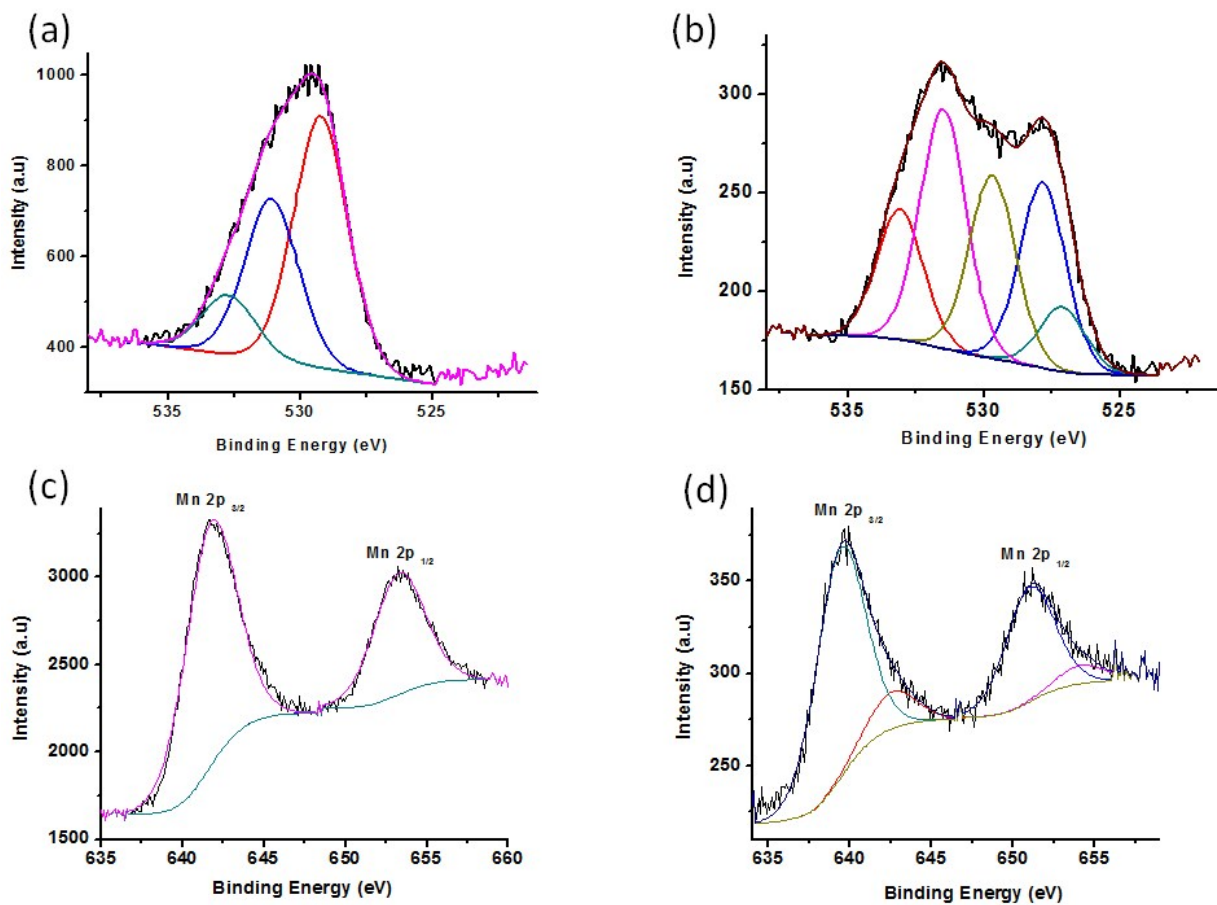

**Figure S12.** XPS of meso MnO<sub>x</sub>. O 1s (a) before reaction and (b) after reaction under nitrogen. And Mn 2p (c) before reaction and (d) after reaction under nitrogen.

**Table S1.** Effect of solvents in aromatization of 1,2,3,4-tetrahydroquinoline

| Entry | Solvent      | Temperature<br>(°C) | Conversion <sup>b</sup><br>(%) | Selectivity <sup>b</sup><br>(%) |
|-------|--------------|---------------------|--------------------------------|---------------------------------|
| 1     | DMF          | 130                 | 50                             | >99                             |
| 2     | Acetonitrile | 80                  | 23                             | >99                             |
| 3     | Dioxane      | 100                 | 28                             | >99                             |
| 4     | Toluene      | 110                 | 15                             | >99                             |
| 5     | Hexane       | 60                  | 14                             | >99                             |

<sup>a</sup> Reaction conditions: 1,2,3,4-tetrahydroquinoline (0.25 mmol), meso MnO<sub>x</sub> (25 mg), DMF (5 mL), 130°C, air balloon, 5 h. <sup>b</sup> Conversions and selectivity were determined by GC-MS based on concentration of 1,2,3,4-tetrahydroquinoline.

**Table S2.** Physicochemical properties of meso MnO<sub>x</sub> at different calcination temperatures

| Catalyst                   | Structure                      | Surface Area<br>S <sub>BET</sub> (m <sup>2</sup> g <sup>-1</sup> ) | BJH ads.<br>pore size<br>(nm) | Pore volume<br>(cc g <sup>-1</sup> ) |
|----------------------------|--------------------------------|--------------------------------------------------------------------|-------------------------------|--------------------------------------|
| Meso MnO <sub>x</sub> -250 | Amorphous                      | 182                                                                | 2.8                           | 0.21                                 |
| Meso MnO <sub>x</sub> -350 | Amorphous                      | 226                                                                | 5.5                           | 0.24                                 |
| Meso MnO <sub>x</sub> -450 | Mn <sub>2</sub> O <sub>3</sub> | 150                                                                | 7.8                           | 0.26                                 |

**Table S3.** Effect of oxidants and additives in aromatization of 1,2,3,4-tetrahydroquinoline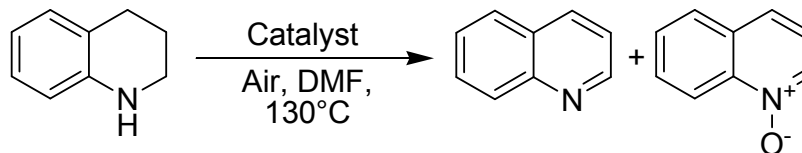

| Entry          | Oxidant                 | Additives | Conversion <sup>b</sup> | Selectivity <sup>b</sup> |
|----------------|-------------------------|-----------|-------------------------|--------------------------|
|                |                         |           | (%)                     | (%)                      |
| 1              | Air                     | none      | 50                      | >99                      |
| 2              | O <sub>2</sub>          | none      | 49                      | 83                       |
| 3 <sup>c</sup> | Air                     | none      | 25                      | >99                      |
| 4 <sup>c</sup> | O <sub>2</sub> (10 bar) | none      | 44                      | >99                      |

<sup>a</sup> Reaction conditions: 1,2,3,4-tetrahydroquinoline (0.25 mmol), meso MnO<sub>x</sub> (25 mg), DMF (5 mL), 130°C, air balloon, 5 h. <sup>b</sup> Conversions and selectivity were determined by GC-MS based on concentration of 1,2,3,4-tetrahydroquinoline. <sup>c</sup> 10 mg catalyst was used.

**Table S4** Summary of XPS results

| Meso MnO <sub>x</sub>         | Mn (eV)           |       |                   |       | O <sub>s</sub> |       | O <sub>ads</sub> |       | O <sub>mw</sub> |       |
|-------------------------------|-------------------|-------|-------------------|-------|----------------|-------|------------------|-------|-----------------|-------|
|                               | 2p <sub>3/2</sub> |       | 2p <sub>1/2</sub> |       | BE (eV)        | %Area | BE (eV)          | %Area | BE (eV)         | %Area |
| Before reaction               | 641.7             | -     | 652.4             | -     | 529.2          | 62.6  | 530.9            | 27.3  | 532.8           | 9.9   |
| Reaction under N <sub>2</sub> | 639.4             | 642.5 | 651.0             | 654.0 | 529.6          | 22.8  | 531.4            | 29.7  | 533.0           | 16.26 |

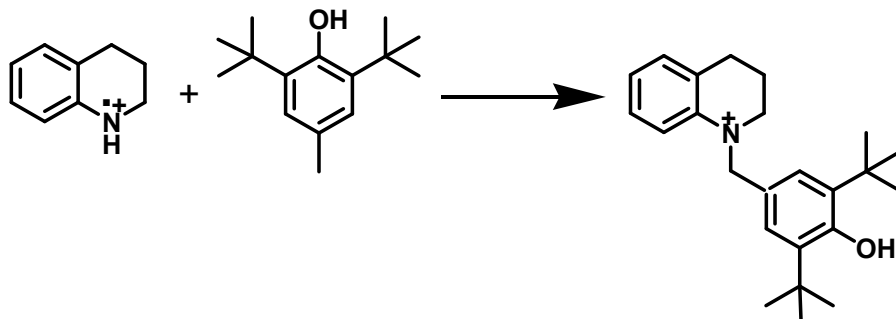

**Scheme S1.** Intermediate **I** Trapping: Reaction procedure: 1,2,3,4-tetrahydroquinoline (0.25 mmol) radical inhibitor (2.5 mmol), meso  $\text{MnO}_x$  (25 mg), DMF (5 mL),  $130^\circ\text{C}$ , air balloon, 5 h. The adduct was identified by GC-MS (molar mass 351).

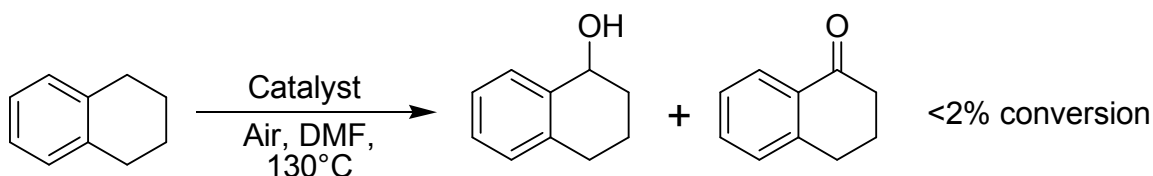

**Scheme S2.** Reaction with 1,2,3,4-tetrahydronaphthalene. Reaction procedure: 1,2,3,4-tetrahydronaphthalene (0.25 mmol) meso  $\text{MnO}_x$  (25 mg), DMF (5 mL),  $130^\circ\text{C}$ , air balloon, 5 h.

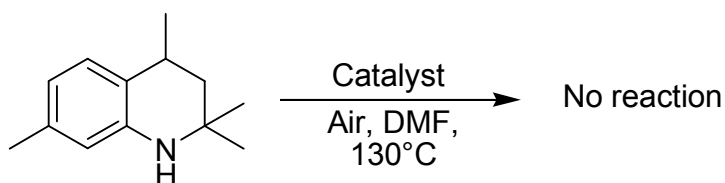

**Scheme S3.** Reaction with a 1,2,3,4-tetrahydroquinoline derivatives having double substitution at alpha position. Reaction procedure: 1,2,3,4-Tetrahydro-2,2,4,7-tetramethylquinoline (0.25 mmol) meso  $\text{MnO}_x$  (25 mg), DMF (5 mL),  $130^\circ\text{C}$ , air balloon, 5 h.

## Characterization of typical products

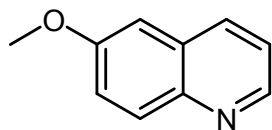

### 6-methoxyquinoline

Appearance: Yellow oil

<sup>1</sup>H NMR (400 MHz, Chloroform-*d*) δ 8.76 (dd, *J* = 4.2, 1.5 Hz, 1H), 8.03 (dd, *J* = 19.4, 8.7 Hz, 2H), 7.36 (dt, *J* = 8.2, 3.3 Hz, 2H), 7.06 (d, *J* = 2.8 Hz, 1H), 3.92 (s, 3H).

<sup>13</sup>C NMR (101 MHz, Chloroform-*d*): δ 158.02, 147.77, 144.21, 135.35, 130.57, 129.58, 122.71, 121.59, 105.34, 55.70.

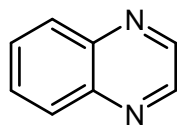

### Quinoxaline

Appearance: Yellow oil

<sup>1</sup>H NMR (400 MHz, Chloroform-*d*) δ 8.84 (s, 1H), 8.11 (dd, *J* = 6.4, 3.5 Hz, 1H), 7.78 (dd, *J* = 6.4, 3.4 Hz, 1H).

<sup>13</sup>C NMR (101 MHz, Chloroform-*d*) δ 145.21, 130.32, 129.75.

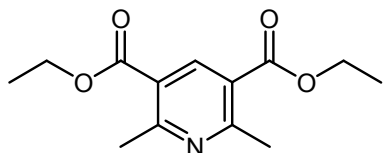

### Diethyl 2,6-dimethylpyridine-3,5-dicarboxylate

Appearance: White powder

<sup>1</sup>H NMR (400 MHz, Chloroform-*d*) δ 8.59 (s, *J* = 2.4 Hz, 1H), 4.32 (m, *J* = 2.4 Hz, 4H), 2.76 (d, *J* = 2.5 Hz, 6H), 1.34 (td, *J* = 2.5 Hz, 6H).

<sup>13</sup>C NMR (101 MHz, Chloroform-*d*) δ 160.06, 162.35, 141.01, 123.19, 61.51, 25.09, 14.41.

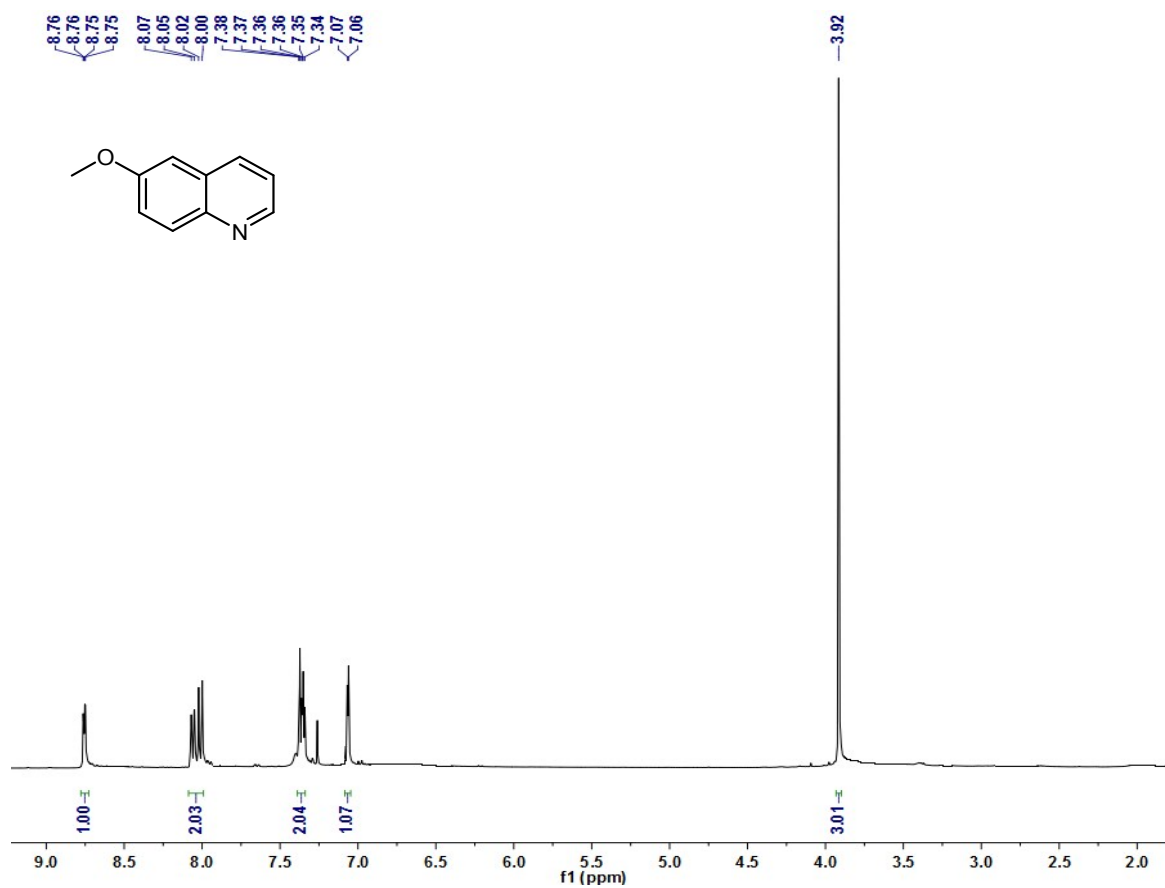

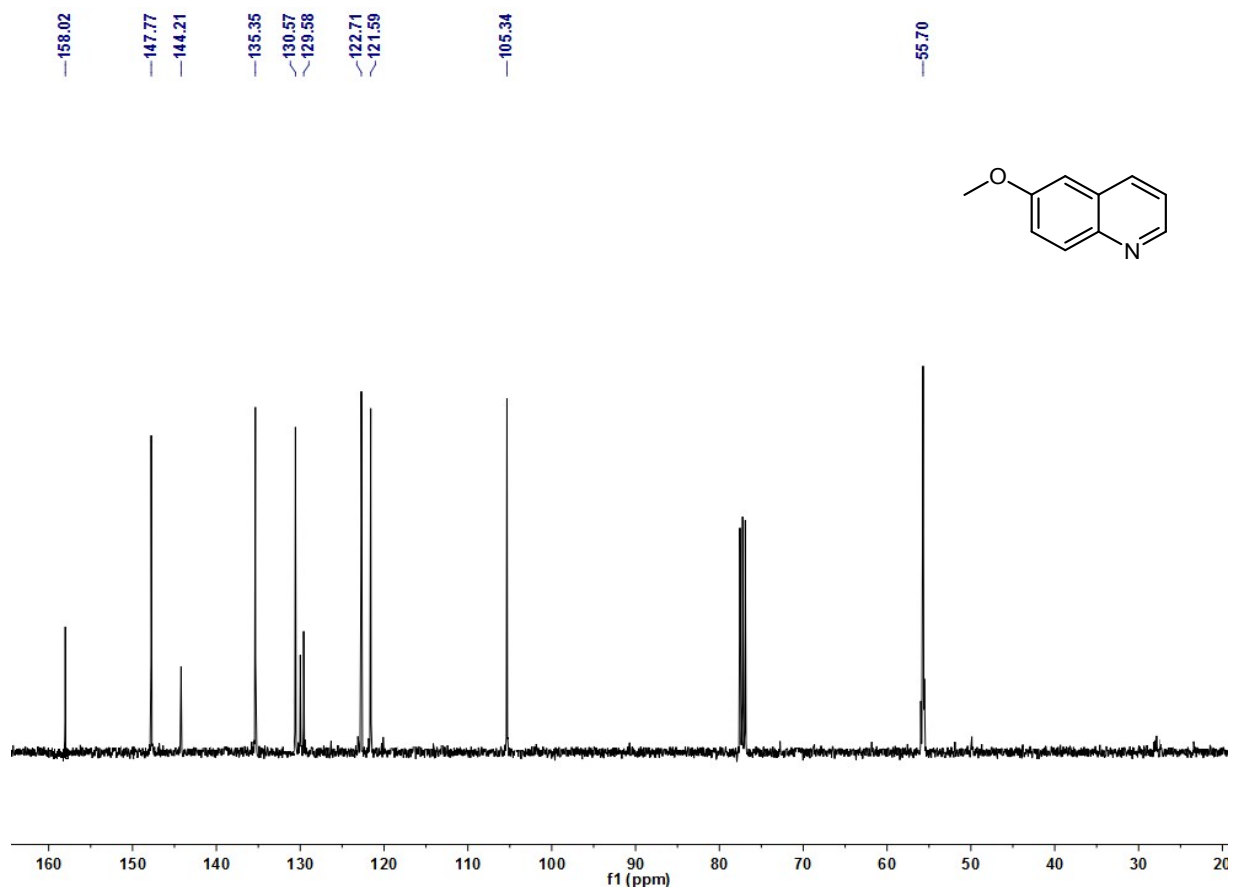

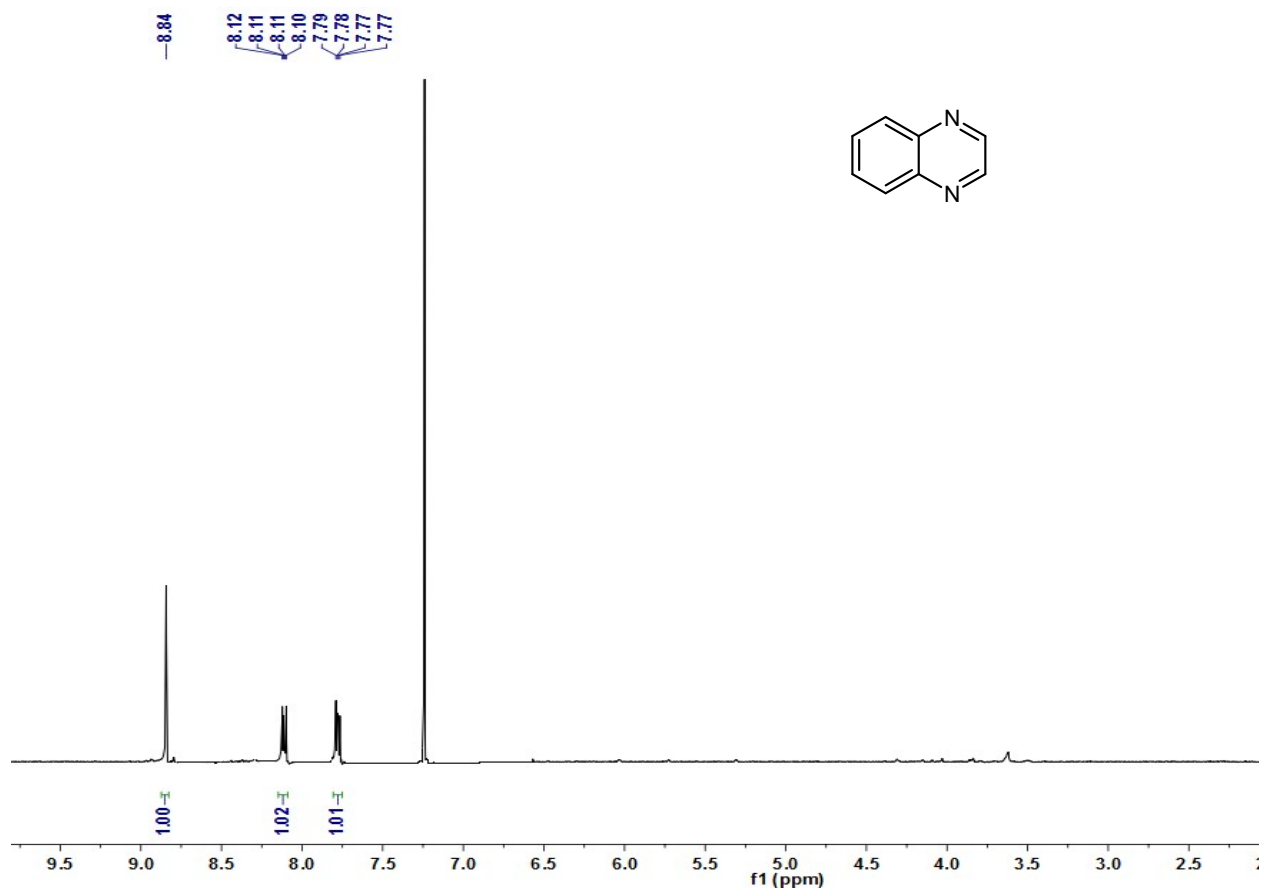



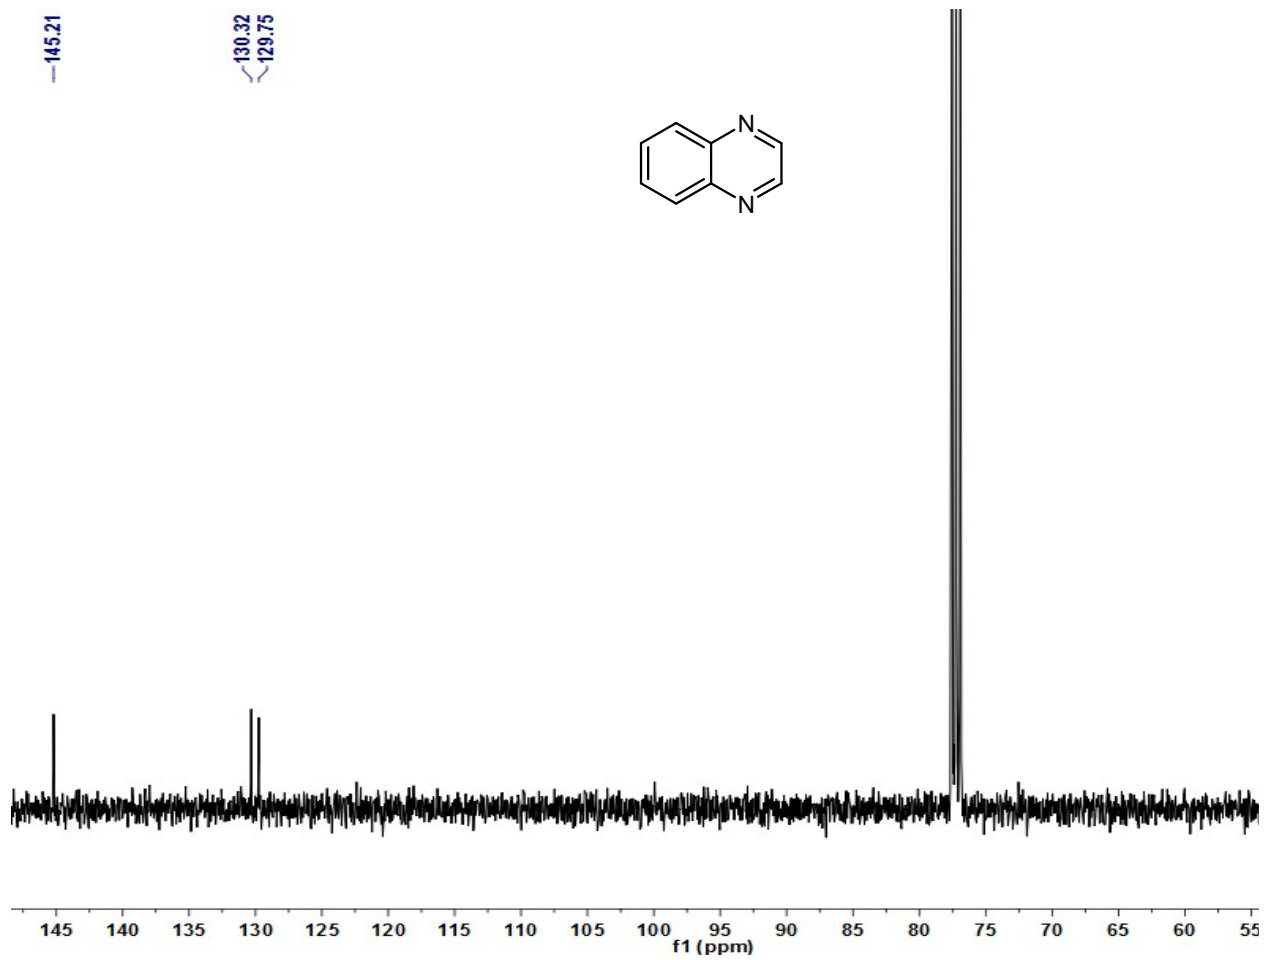

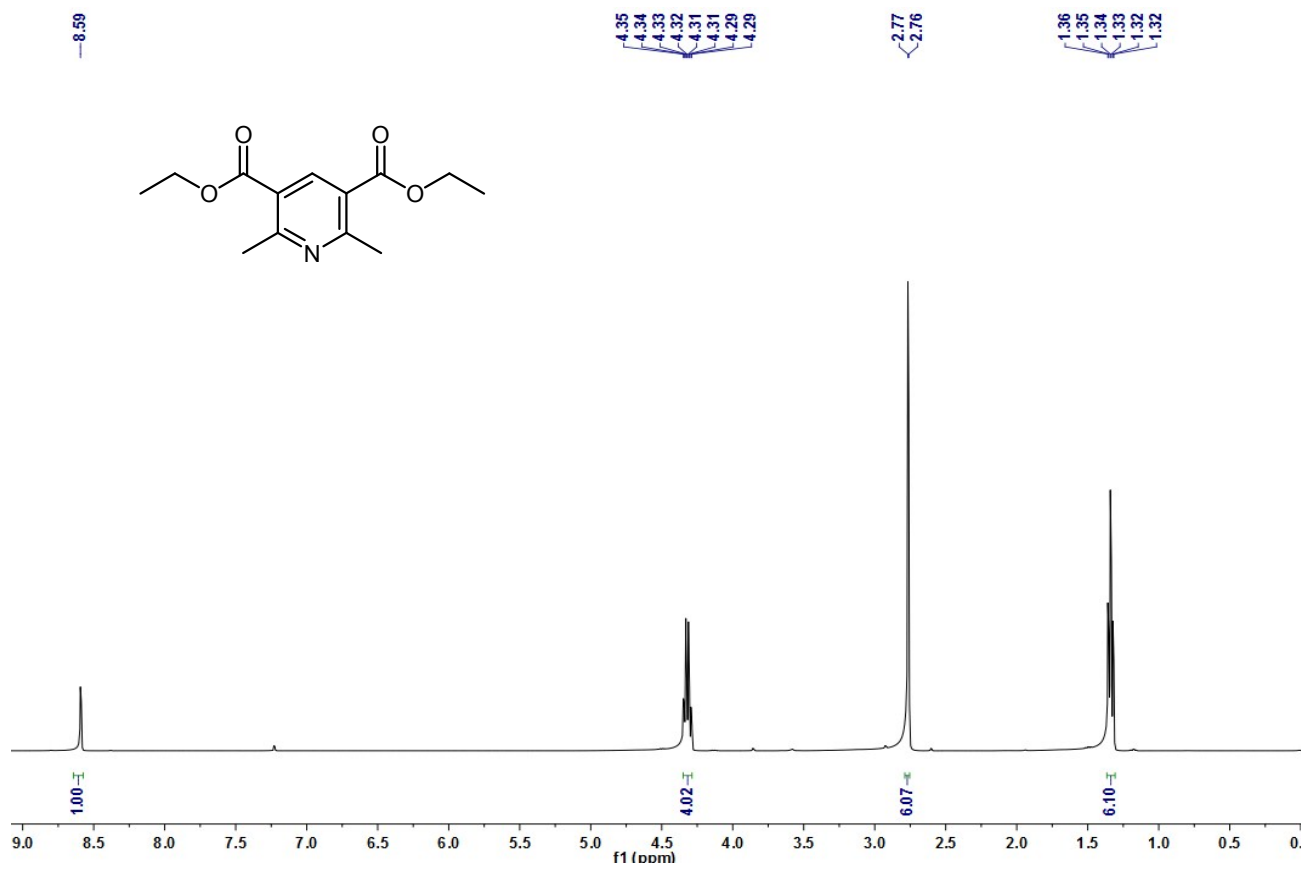

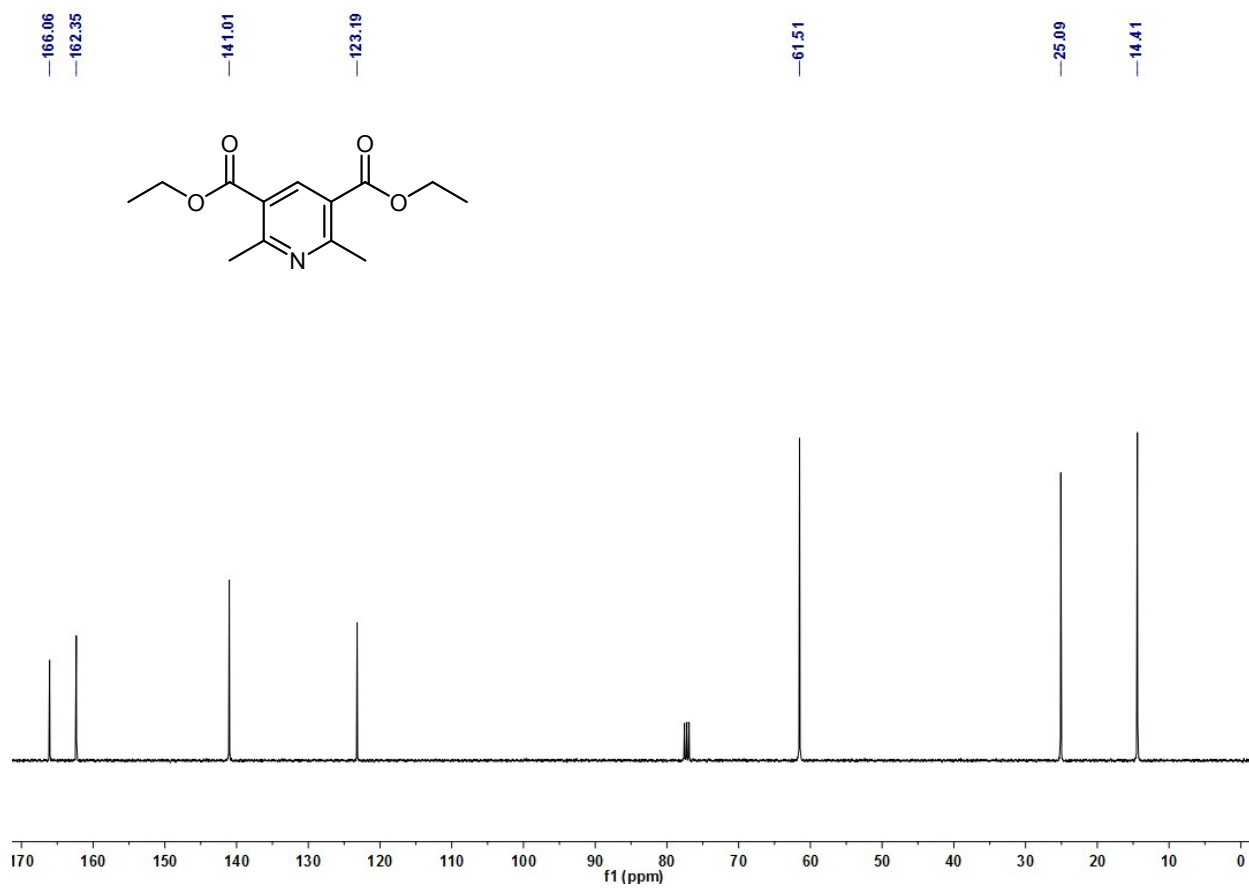

## References

1. A. S. Poyraz, C.-H. Kuo, S. Biswas, C. K. King'onde and S. L. Suib, *Nat. Commun.*, 2013, **4**, 2952.
